# Supplementary material for: Highly Multiplexed Immunohistochemical MALDI-MS Imaging of Biomarkers in Tissues
Source: PubMed Central journal article supplement (PMC8033562; doi:10.1021/jasms.0c00473), 2021-02-25
Supplement: js0c00473_si_001.pdf [file js0c00473_si_001.pdf]

## 1 **Materials**

2 1,5-diaminonaphthalene (DAN, 97%), 2,5-dihydroxybenzoic acid (DHB, 98.0%),  
3 paraformaldehyde (powder, 95%), citrate buffer (pH 6.0, 10x) and octyl  $\beta$ -D-  
4 glucopyranoside (OBG) (50% [w/v] stock solution) were from Sigma Aldrich (St. Louis,  
5 MO). Tween®-20, molecular biology grade was from Promega (Madison, WI). Antigen  
6 Retrieval Reagent-Basic (CTS013), Antigen Retrieval Reagent-Universal (CTS015) and  
7 Antigen Retrieval Reagent-Acidic (CTS015) were from R&D Systems/BioTechne  
8 (Minneapolis, MN). DyLight 650 NHS ester and anti-streptavidin antibody clone S3E11  
9 were from Thermo Fisher Scientific (Waltham, MA). Gold coated microscope slides were  
10 from Angstrom Engineering, Inc. (Kitchener, ON, Canada). Mouse C57 brain sagittal  
11 FFPE sections (5  $\mu$ m thickness) and mouse C57 brain sagittal Fresh Frozen (FF) sections  
12 (embedded in 2% w/v CMC, 10  $\mu$ m thickness) were from Zyagen (San Diego, CA). Breast  
13 cancer tissue FFPE blocks were from OriGene Technologies, Inc. (Rockville, MD) and  
14 normal tonsil tissue FFPE blocks were from Amsbio LLC (Cambridge, MA), all were  
15 sectioned (5  $\mu$ m thickness) and mounted onto slides by Zyagen (San Diego, CA). Mouse  
16 IgG whole molecule (015-000-003), normal mouse serum (015-222-001), rabbit IgG  
17 whole molecule (011-000-003) and normal rabbit serum (011-000-001) were from  
18 Jackson ImmunoResearch Laboratories, Inc. (West Grove, PA). Streptavidin-coated 20  
19  $\mu$ m PMMA beads (microspheres) were from PolyAn GmbH (Berlin, Germany). 0.5 mL  
20 Ultrafree-MC centrifugal 0.45  $\mu$ m filter devices were from Millipore Sigma (Burlington,  
21 MA). PD SpinTrap G-25 columns were from GE Healthcare Life Sciences (Pittsburgh,  
22 PA). MALDI-IHC and bead-array antibodies were obtained from various suppliers as  
23 follows: human/mouse/rat anti-myelin basic protein (MAB42282) from R&D

24 Systems/BioTechne (Minneapolis, MN); anti-NeuN antibody, clone A60 (MAB377) and  
25 anti-synapsin-2 antibody, clone 19.4 (MABN1573) from Millipore Sigma (Burlington, MA);  
26 human/mouse anti-GLUT1 (PA146152) from Fisher Scientific (Hampton, NH); and anti-  
27 MAP2 antibody [AP-20] (ab11268), recombinant anti-NeuN (ab209898; BSA and azide  
28 free), recombinant anti-myelin basic protein (ab230378; BSA and azide free),  
29 recombinant rabbit IgG, monoclonal [SP137] - isotype control (ab208334; BSA and azide  
30 free), recombinant anti-pan cytokeratin antibody [C-11] (ab264485; BSA and azide free),  
31 recombinant anti-CD3 epsilon antibody [CAL57] (ab251607; BSA and azide free),  
32 recombinant anti-CD4 antibody [EPR6855] (ab181724; BSA and azide free), recombinant  
33 anti-CD8 alpha antibody [CAL66] (ab251596; BSA and azide free), recombinant anti-  
34 CD20 antibody [EP459Y] (ab214282; BSA and azide free), anti-CD45RO antibody [UCH-  
35 L1] (ab23), recombinant anti-estrogen receptor alpha antibody [SP1] (ab187260; BSA  
36 and azide free), recombinant anti-progesterone receptor antibody [YR85] (ab206926;  
37 BSA and azide free), recombinant anti-ErbB 2 antibody [CAL27] (ab251602; BSA and  
38 azide free), recombinant anti-histone H2A.X antibody [EPR22820-23] - CHIP (ab256544;  
39 BSA and azide free), recombinant anti-CD68 antibody [EPR20545] (ab227458; BSA and  
40 azide free), and recombinant anti-Ki67 antibody [EPR3610] (ab209897; BSA and azide  
41 free) were from Abcam (Cambridge, MA). FlexWell™ 16-Chamber Self-Adhesive  
42 Gaskets (204916) were from Grace Bio-Labs (Bend, Oregon).

43

## 44 **Methods**

45 **Handling of photocleavable reagents.** Photocleavable reagents were protected from  
46 light during all long incubation steps ( $\geq 15$  min) and during storage, but were otherwise  
47 handled under ambient laboratory lighting.

48  
49 **Probing streptavidin beads with PC-MT-antibodies and bead-array formation.**

50 Streptavidin-coated 20  $\mu\text{m}$  PMMA beads were processed in 0.5 mL Ultrafree-MC  
51 centrifugal 0.45  $\mu\text{m}$  filter devices unless otherwise noted (washing was performed by 3 s  
52 vortex mixing of bead suspensions in the filter devices and filtration was performed for 5  
53 s at 15,000 rpm on a standard micro-centrifuge). For each PC-MT-antibody version,  
54 10,000 beads were used and processed separately unless otherwise noted. Beads were  
55 first washed 4x 400  $\mu\text{L}$  with Bead Block Buffer (1% BSA [w/v] in TBS-T; note TBS-T is  
56 TBS supplemented with 0.05% [v/v] Tween-20). Beads were then probed separately with  
57 15 different versions of an anti-streptavidin PC-MT-antibody, each PC-MT-antibody  
58 version carrying a different PC-MT species (*i.e.* different mass unit; see Supplementary  
59 Table S1 for mass units and Supplementary Table S1.1 for stable isotopic amino acids  
60 used in some mass units). PC-MT-antibodies were diluted to 1  $\mu\text{g}/\text{mL}$  in Bead Block  
61 Buffer and probing was performed using 100  $\mu\text{L}$  for 1 hr with gentle mixing. Beads were  
62 then washed 4x 400  $\mu\text{L}$  with TBS-T followed by pooling all 15 different bead versions.  
63 Pooled beads were then washed further 4x 400  $\mu\text{L}$  with mass spectrometry grade water  
64 (MS-Water). Formation of random bead-arrays on indium tin oxide (ITO) coated microwell  
65 substrates having the footprint of a standard microscope slide was performed as

66 previously reported [1, 2] (note that after bead-array formation slides were dried 45 min  
67 in a vacuum desiccation chamber).

68

69 **Multiplex mass spectrometry-based immunohistochemistry (MALDI-IHC).** For  
70 deparaffinization and hydration, FFPE tissue sections were treated as follows (each  
71 treatment step in separate staining jars): 3x with xylene for 5 min each; 1x with  
72 xylene:ethanol (1:1) for 3 min; and then hydrate 2x with 100% ethanol for 2 min each, 1x  
73 with 95% ethanol for 3 min each, 1x with 70% ethanol for 3 min, 1x with 50% ethanol for  
74 3 min and 1x with TBS for 10 min. Antigen retrieval was achieved in 200 mL of 95°C 1X  
75 citrate buffer (pH 6.0; see Materials) for 1 hr and followed by cooling in the same beaker  
76 for 30 min at room temperature. Alternatively, acidic or basic antigen retrieval was  
77 achieved for tonsil and breast cancer tissues in 60 mL of 95°C 1X Antigen Retrieval  
78 Reagent-Acidic or 1X Antigen Retrieval Reagent-Basic (see Materials) for 30 min and  
79 followed by cooling in the same Coplin staining jar for 30 min at room temperature. Slides  
80 were then blocked in a staining jar for 1 hr with 50 mL Tissue Blocking Buffer (2% [v/v]  
81 normal serum [rabbit and mouse] and 5% (w/v) BSA in TBS-T). For PC-MT-antibody  
82 staining, slides were treated at 4°C for overnight with 200 µL/section of a solution  
83 containing 2.5 µg/mL of each antibody for mouse brain and 0.5 µg/mL of each antibody  
84 for human tonsil and breast cancer, diluted in Tissue Blocking Buffer (incubation was  
85 performed protected from light, in a humidified chamber to avoid evaporation and with  
86 each tissue section surrounded by hydrophobic barrier pen to retain the fluid). The slides  
87 were next washed as follows: 3x 5 min each with TBS followed by 3x 2 min each with 50  
88 mM ammonium bicarbonate (note, all solutions were in MS-Water and all washes were

89 performed using excess solution with the slides placed horizontally in a petri dish with  
90 gentle shaking). Tissue slides were ultimately dried for 45 min in a vacuum desiccation  
91 chamber.

92  
93 **Immunofluorescence staining.** In some cases, immunofluorescence was performed  
94 instead of staining with PC-MT-antibodies. In these cases, antibodies were labeled with  
95 a 15-fold molar excess of a DyLight 650 NHS Ester reagent (added from a 5 mM stock in  
96 DMF). Immunostaining with fluorescent antibodies was otherwise performed in the same  
97 manner as with the PC-MT-antibodies. Fluorescence imaging of dried slides was  
98 performed on a GenePix 4200A fluorescence scanner at 5  $\mu\text{m}$  resolution (Molecular  
99 Devices, San Jose, CA).

100

## 101 **References**

- 102 1. Zhou, Y., Liu, Z., Rothschild, K.J., **Lim, M.J.**: Proteome-wide drug screening  
103 using mass spectrometric imaging of bead-arrays. *Sci Rep.* **6**, 26125 (2016)
- 104 2. Lim, M.J., Liu, Z., Braunschweiger, K.I., Awad, A., Rothschild, K.J.: Correlated  
105 matrix-assisted laser desorption/ionization mass spectrometry and fluorescent  
106 imaging of photocleavable peptide-coded random bead-arrays. *Rapid Commun*  
107 *Mass Spectrom.* **28**, 49-62 (2014)

108
