# Supplementary material for: Highly Multiplexed Immunohistochemical MALDI-MS Imaging of Biomarkers in Tissues
Source: PubMed Central journal article supplement (PMC8033562; doi:10.1021/jasms.0c00473), 2021-02-25
Supplement: js0c00473_si_002.pdf [file js0c00473_si_002.pdf]

**Supplementary Table S1. Mass Unit Sequences for PC-MTs and Mass Reporter Masses**

| Mass Unit ID | Mass Unit Amino Acid Sequence* | Mass Reporter Mass (Monoisotopic)* | Antibody                 |
|--------------|--------------------------------|------------------------------------|--------------------------|
| 1            | APRLRFYSL                      | 1,206.72                           | Myelin, CK, Streptavidin |
| Iso-1.1      | (A)PRLRFYSL                    | 1,210.74                           | CD3                      |
| Iso-1.2      | (A)P)RLRFYSL                   | 1,216.75                           | CD4                      |
| Iso-1.3      | A(P)R(L)RFYSL                  | 1,222.79                           | CD8                      |
| Iso-1.4      | (A)P)R(L)RFYSL                 | 1,226.82                           | CD20                     |
| Iso-1.5      | A(P)R(L)R(F)YSL                | 1,230.84                           | CD45RO                   |
| Iso-1.6      | (A)P)R(L)R(F)YSL               | 1,234.87                           | -                        |
| Iso-1.7      | A(P)R(L)R(F)YS(L)              | 1,240.91                           | ER                       |
| Iso-1.8      | (A)P)R(L)R(F)YS(L)             | 1,244.93                           | PR                       |
| 1.1          | APRLRFYSLG                     | 1,263.74                           | -                        |
| 1.2          | SAPRLRFYSL                     | 1,293.75                           | HER2                     |
| 1.3          | GAPRLRFYSLG                    | 1,320.76                           | Histone H2A.X            |
| 1.4          | SAPRLRFYSLG                    | 1,350.76                           | CD68                     |
| 1.5          | GAPRLRFYSLGG                   | 1,377.78                           | Ki67                     |
| 2            | RPPGFSSFR                      | 1,194.67                           | NeuN, Streptavidin       |
| 3            | IPSINVHHY                      | 1,163.65                           | Streptavidin             |
| 4            | YHWYGYTPQNV                    | 1,624.80                           | GLUT1                    |
| 5            | APLFYSL                        | 894.52                             | Synapsin-2, Streptavidin |
| 6            | PPGFSSFF                       | 882.46                             | MAP2, Streptavidin       |
| 7            | LRRASLG                        | 856.56                             | Streptavidin             |
| 8            | PPGASPF                        | 912.52                             | Streptavidin             |
| 9            | RYPFPGP                        | 917.51                             | Streptavidin             |
| 10           | SFLLRNP                        | 930.57                             | Streptavidin             |
| 11           | PPGSPPF                        | 938.53                             | Streptavidin             |
| 12           | RPPGFSP                        | 954.57                             | Streptavidin             |
| 13           | PPGESPF                        | 970.52                             | Streptavidin             |
| 14           | PPGFSPF                        | 988.55                             | Streptavidin             |
| 15           | RGYGYQGL                       | 997.54                             | Streptavidin             |
| 16           | RGYAYQGL                       | 1,011.55                           | Streptavidin             |

Light blue shaded rows are mass unit 1 or variations of mass unit 1 used to minimize variable MALDI-MS ionization efficiency. The red and green letters represent stable isotopic amino acids shown in Supplementary Table S1.1.

\*Mass units are N-terminal acetylated on the  $\alpha$ -amine; the mass reporter masses include this acetylation plus the mass unit and a small portion of the photocleaved PC-Linker (see Fig. 1 Step 3).

**Supplementary Table S1.1. Amino Acid Isotopes**

| <b>1-Letter</b> | <b>Isotopic Amino Acid</b>      | <b>FMOC-Isotopic Amino Acid</b>        |
|-----------------|---------------------------------|----------------------------------------|
| A               | L-ALANINE (2,3,3,3-D4, 98%)     | L-ALANINE-N-FMOC (2,3,3,3-D4, 98%)     |
| P               | L-PROLINE (13C5, 99%; 15N, 99%) | L-PROLINE-N-FMOC (13C5, 99%; 15N, 99%) |
| L               | L-LEUCINE (D10, 98%)            | L-LEUCINE-N-FMOC (D10, 98%)            |
| F               | L-PHENYLALANINE (D8, 98%)       | L-PHENYLALANINE-N-FMOC (D8, 98%)       |

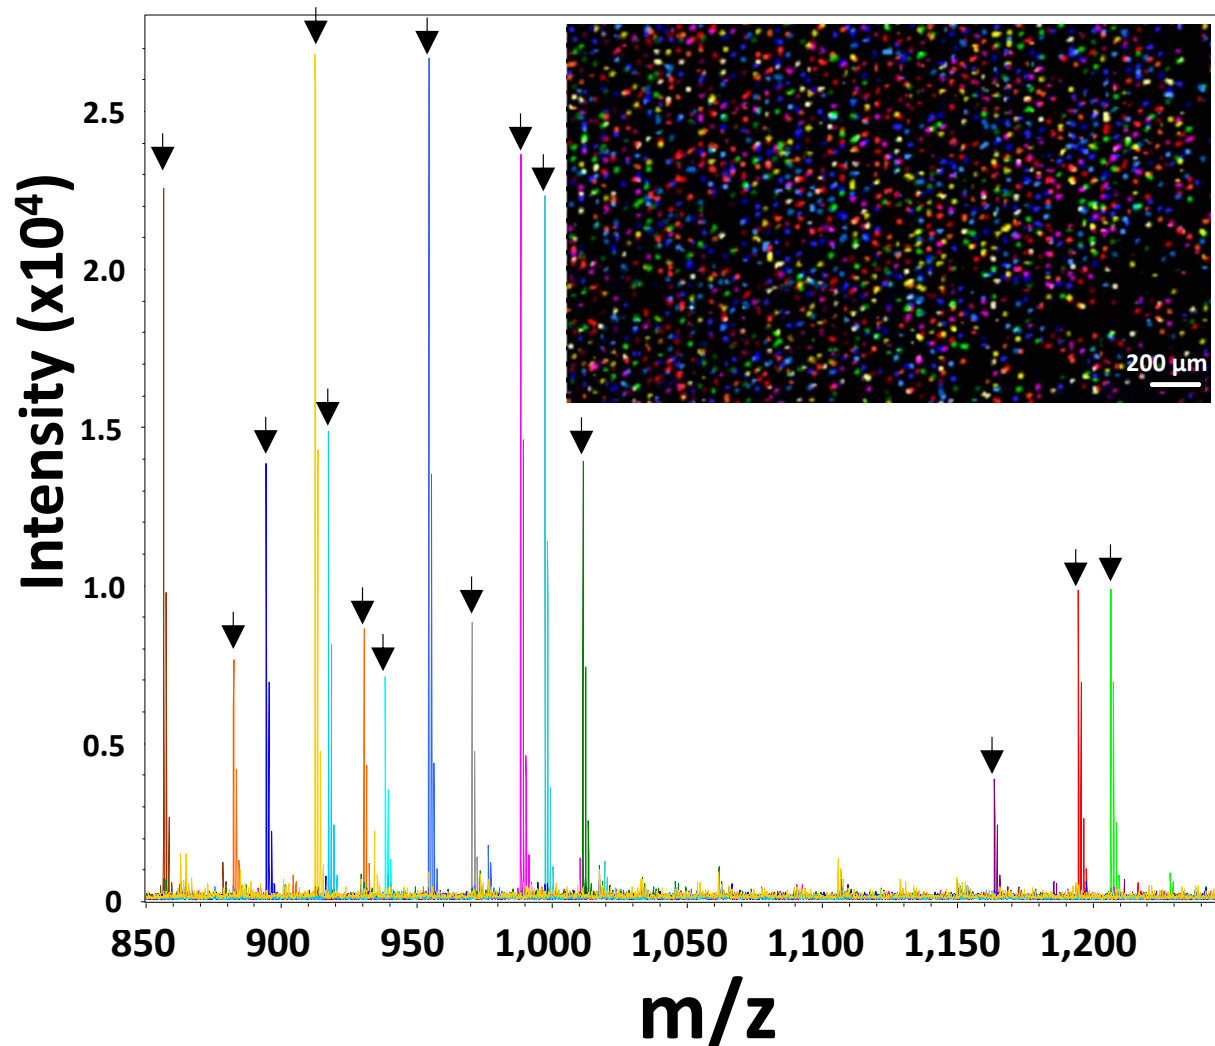

**Supplementary Figure S1. Demonstration of 15-plex MALDI-MSI on bead-arrays as a model system using PC-MT-antibodies.** 15 different anti-streptavidin PC-MT-antibodies were created by direct 1-step labeling with different PC-MTs. Each PC-MT-antibody species was used in a separate reaction to probe 20  $\mu\text{m}$  polymer streptavidin beads. The resultant 15 bead species were then pooled and used to form an array on a substrate having the footprint of a microscope slide, which was then subjected to MALDI-MSI. A colorized 15-plex MALDI-MS image of the bead-array is shown corresponding to the 15 different monoisotopic mass reporter  $m/z$  values from the various PC-MT-antibodies. The color-coded overlaid spectra provided are from representative single pixels from within single beads for each of the 15 different bead species (black arrows indicate the mass reporters). Note that while 1 Da separated natural isotopes of the mass reporters are easily resolved by the MALDI-MS, they are not discernable in the spectra provided due to the compact X-axis scaling. MALDI-MS image is 10  $\mu\text{m}$  spatial resolution.

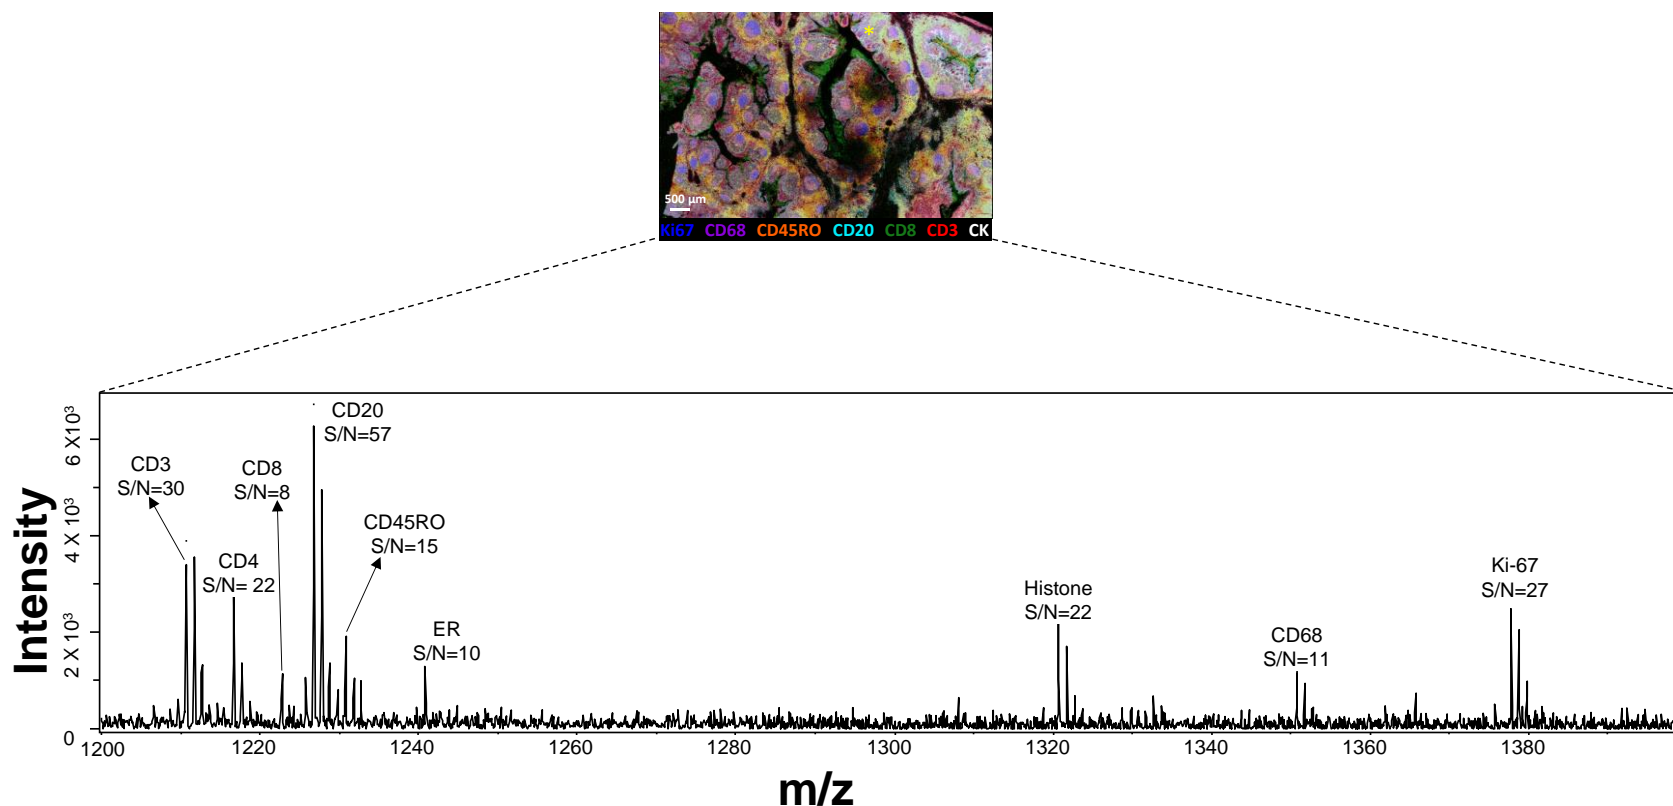

**Supplementary Figure S2. Example spectrum and PC-MT signal-to-noise ratios from MALDI-IHC analysis of human tonsil tissue.** The MALDI-MS image shown is that from Fig. 3c of the main manuscript. The yellow asterisk indicates the region of the image from which the spectrum in the lower panel was acquired (from a single pixel), which contains 9 of the 12 PC-MTs used. Each monoisotopic PC-MT reporter peak in the spectrum is labeled with the corresponding antibody and signal-to-noise (“S/N”) ratio.
